# Supplementary material for: Biological Compositions of Canine Amniotic Membrane and Its Extracts and the Investigation of Corneal Wound Healing Efficacy In Vitro
Source: MDPI journal article supplement (doi:10.3390/vetsci9050227), 2022-05-09
Supplement: s1 [file s1]

## Supplementary Materials

**Figure S1. Relevant proteins detection in canine amniotic membrane and its extracts, uncropped full-length images of Western blot membranes.**

HGF protein expression in cAM.

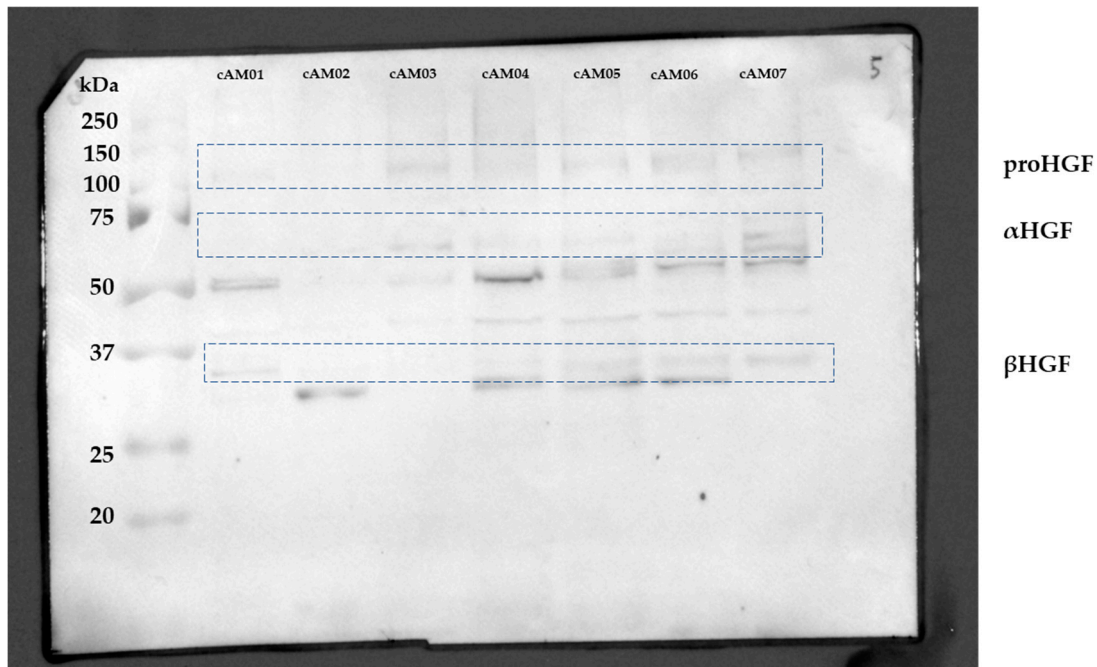

HGF protein expression in cAME.

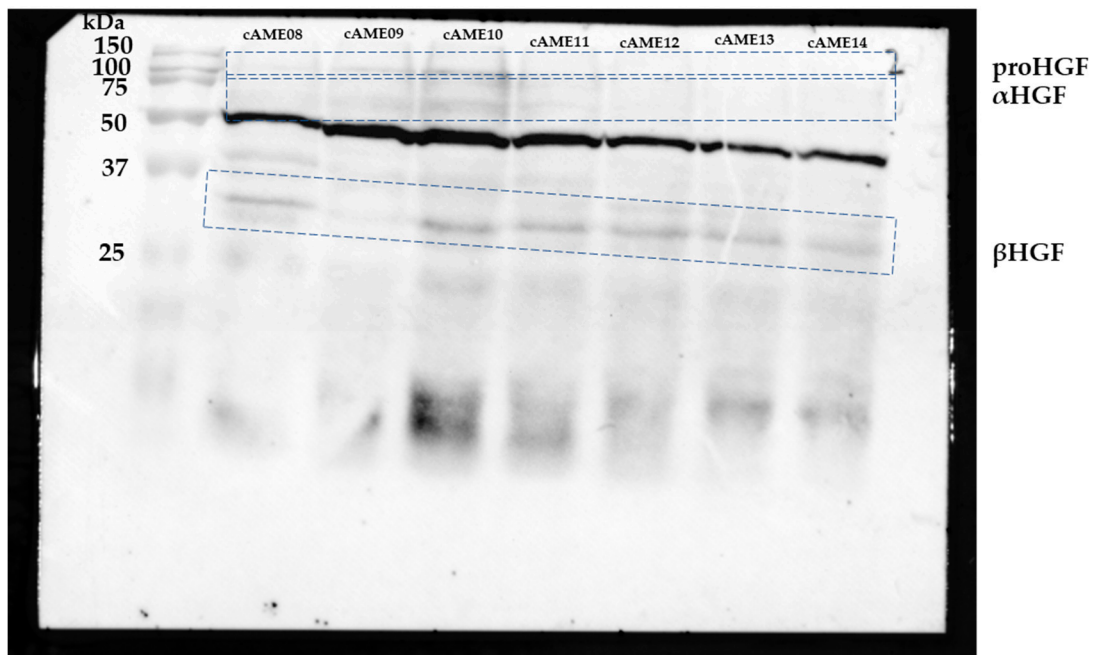

HGF protein expression in cAMX.

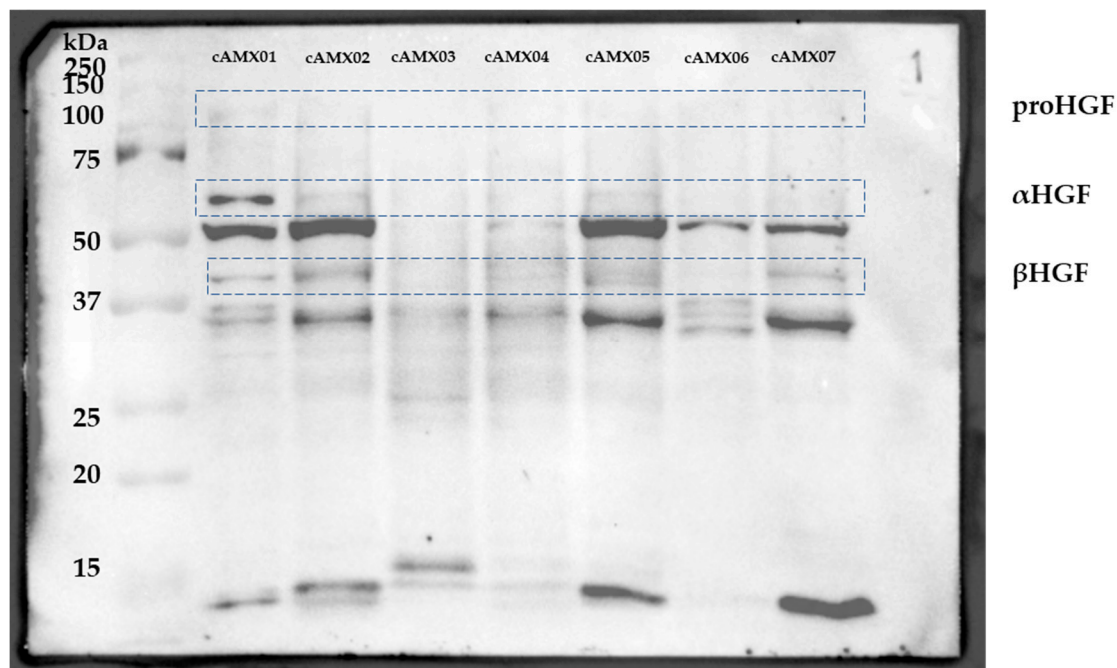

Western blot membranes of HGF (molecular weight of proHGF ~90 kDa,  $\alpha$ HGF ~69 kDa and  $\beta$ HGF ~34 kDa). Proteins separated from SDS-PAGE were transferred onto a 0.2  $\mu$ m PVDF membrane using a Trans-Blot Turbo Transfer System (Bio-Rad Laboratories Inc., Hercules, CA, USA). HGF protein was detected using HGF antibody (1:500, Thermo Fisher Scientific, Waltham, MA, USA) and anti-rabbit IgG HRP conjugated antibody (1:5000, R&D Systems Inc., Minneapolis, MN, USA) as a secondary antibody. Molecular weight (kDa) was determined by Bio-Rad Precision Plus Protein™ Dual Color Standards, 10 to 250 kDa; catalogue number: 1610374 (Bio-Rad Laboratories Inc., Hercules, CA, USA). Clarity™ Western ECL Substrate reagents (Bio-Rad Laboratories Inc., Hercules, CA, USA) were used for band detection and the ChemiDoc Imaging System (Bio-Rad Laboratories Inc., Hercules, CA, USA) was used for visualization. Band intensities of HGF protein were normalized with total protein intensities (Pierce™ Reversible Protein Stain Kit for PVDF Membranes, Thermo Fisher Scientific, Waltham, MA, USA) and analyzed using Bio-Rad Image Lab Software (version 6.0.1, Bio-Rad Laboratories Inc., Hercules, CA, USA). Each lane represented each sample in each group.

TIMP-1 protein expression in cAM.

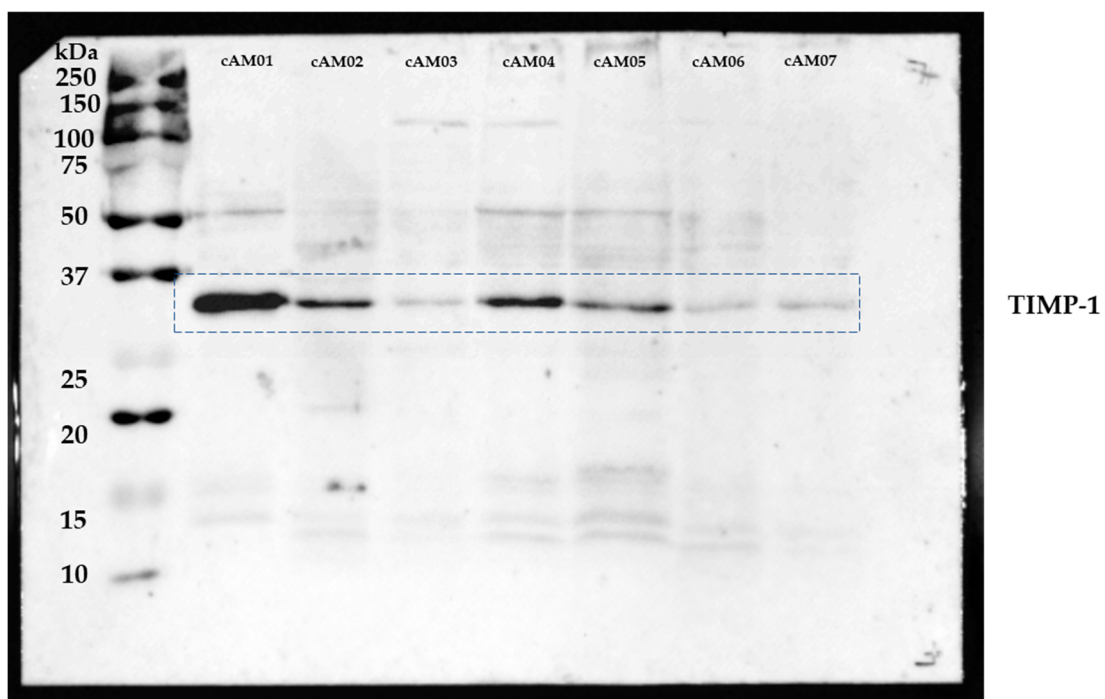

TIMP-1 protein expression in cAME.

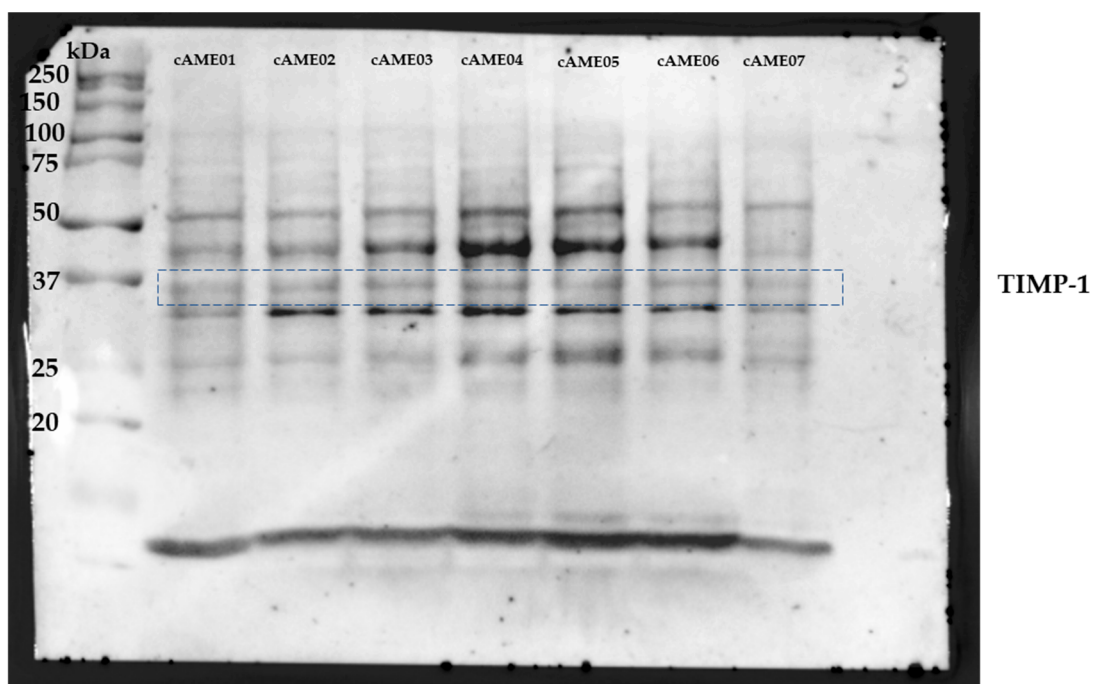

TIMP-1 protein expression in cAMX.

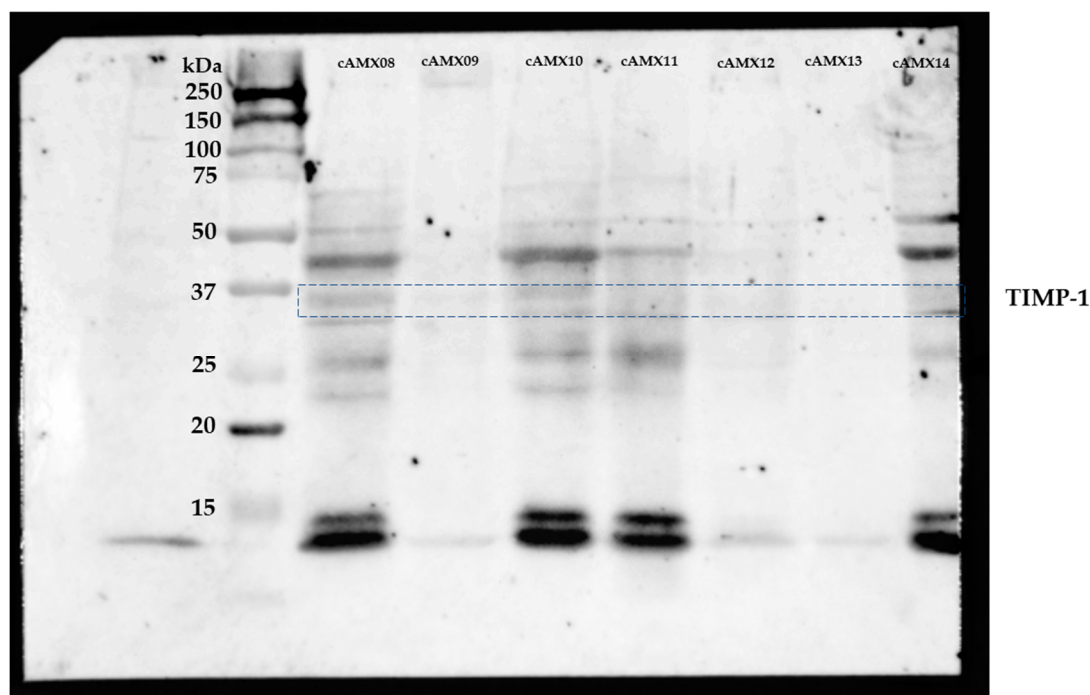

Western blot membranes of TIMP-1 (molecular weight of TIMP-1 ~35 kDa). Proteins separated from SDS-PAGE were transferred onto a 0.2  $\mu$ m PVDF membrane using a Trans-Blot Turbo Transfer System (Bio-Rad Laboratories Inc., Hercules, CA, USA). TIMP-1 protein was detected using TIMP-1 antibody (1:1000, Thermo Fisher Scientific, Waltham, MA, USA) and m-IgGk BP-HRP (1:10,000, Santa Cruz Biotechnology, Dallas, TX, USA) as a secondary antibody. Bio-Rad Precision Plus Protein™ Dual Color Standards, 10 to 250 kDa; catalogue number: 1610374 (Bio-Rad Laboratories Inc., Hercules, CA, USA) was used as molecular weight marker (kDa). Clarity™ Western ECL Substrate (Bio-Rad Laboratories Inc., Hercules, CA, USA) was used for band detection and the ChemiDoc Imaging System (Bio-Rad Laboratories Inc., Hercules, CA, USA) was used for visualization. Band intensities of TIMP-1 protein were normalized with total protein intensities (Pierce™ Reversible Protein Stain Kit for PVDF Membranes, Thermo Fisher Scientific, Waltham, MA, USA) and analyzed using Bio-Rad Image Lab Software (version 6.0.1, Bio-Rad Laboratories Inc., Hercules, CA, USA). Each lane represented each sample in each group.

SDS-PAGE gel image showing protein expression across seven lanes labeled cAM01 to cAM07. Molecular weight markers are on the left at 250, 150, 100, 75, 50, 37, 25, 20, and 15 kDa. A dashed box highlights a band around 20 kDa in lanes cAM05, cAM06, and cAM07. A handwritten '7' is in the top right corner.

SDS-PAGE gel image showing protein expression levels for cAME01 through cAME07. Molecular weight markers are indicated on the left at 250, 150, 100, 75, 50, 37, 25, and 20 kDa. A dashed blue box highlights the region between 25 and 50 kDa across all lanes.

**TIMP-2**



TIMP-2 protein expression in cAMX.

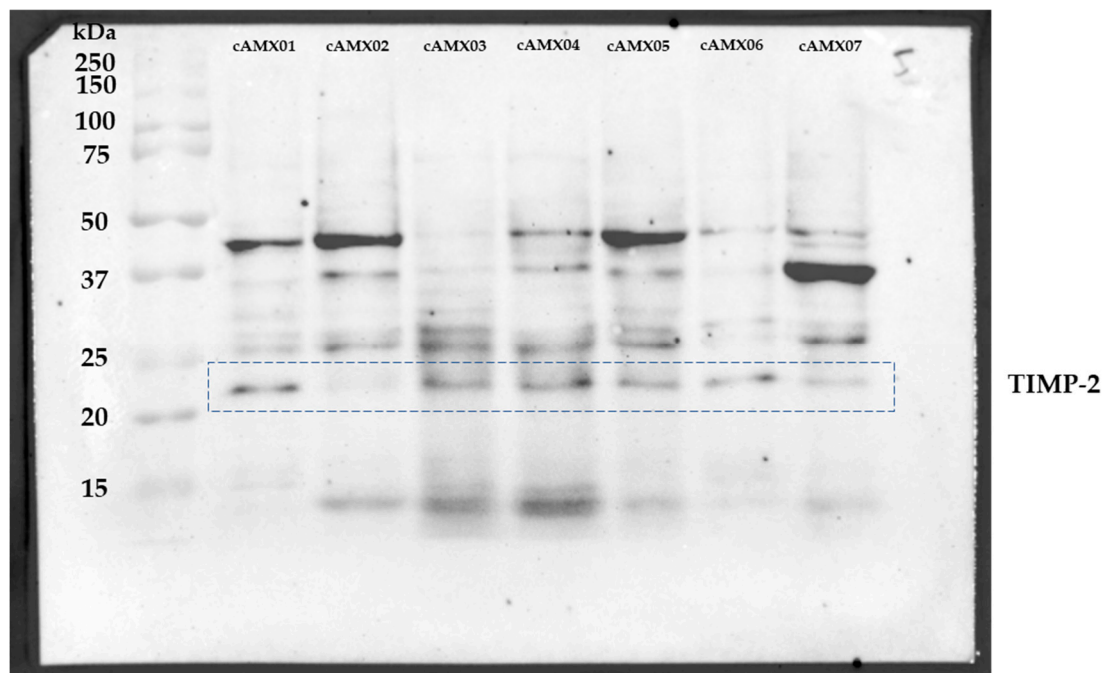

Western blot membranes of TIMP-2 (molecular weight of TIMP-2 ~22 kDa). Proteins separated from SDS-PAGE were transferred onto a 0.2  $\mu$ m PVDF membrane using a Trans-Blot Turbo Transfer System (Bio-Rad Laboratories Inc., Hercules, CA, USA). TIMP-2 protein was detected using TIMP-2 antibody (1:1000, Thermo Fisher Scientific, Waltham, MA, USA) and m-IgGk BP-HRP (1:10,000, Santa Cruz Biotechnology, Dallas, TX, USA) as a secondary antibody. Molecular weight marker (kDa): Bio-Rad Precision Plus Protein™ Dual Color Standards, 10 to 250 kDa; catalogue number: 1610374 (Bio-Rad Laboratories Inc., Hercules, CA, USA). Band detection was done by Clarity™ Western ECL Substrate (Bio-Rad Laboratories Inc., Hercules, CA, USA) and visualization using ChemiDoc Imaging System (Bio-Rad Laboratories Inc., Hercules, CA, USA). Band intensities of TIMP-2 protein were normalized with total protein intensities (Pierce™ Reversible Protein Stain Kit for PVDF Membranes, Thermo Fisher Scientific, Waltham, MA, USA) and analyzed using Bio-Rad Image Lab Software (version 6.0.1, Bio-Rad Laboratories Inc., Hercules, CA, USA). Each lane represented each sample in each group.

TSP-1 protein expression in cAM.

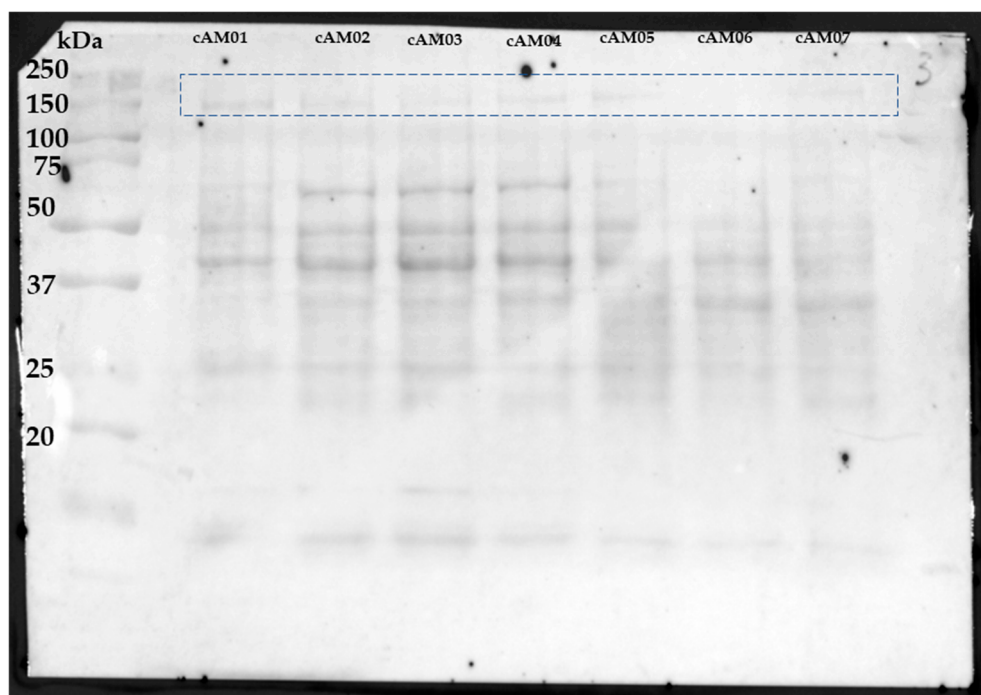

TSP-1

TSP-1 protein expression in cAME.

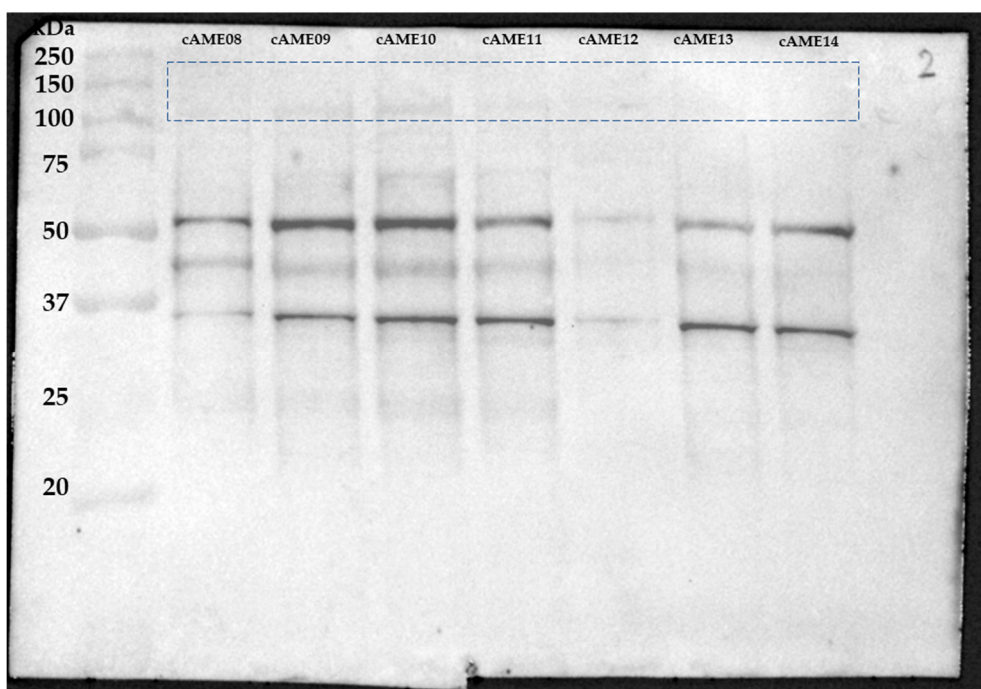

TSP-1

TSP-1 protein expression in cAMX.

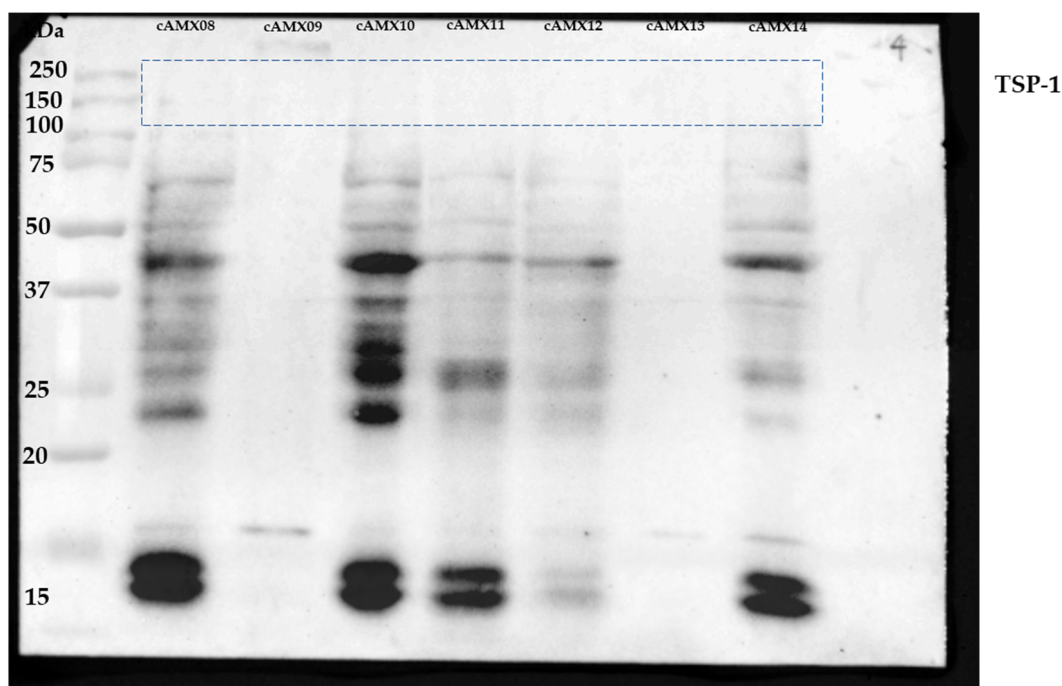

Western blot membranes of TSP-1 (molecular weight of TSP-1 ~169-198 kDa). Proteins separated from SDS-PAGE were transferred onto a 0.2  $\mu$ m PVDF membrane using a Trans-Blot Turbo Transfer System (Bio-Rad Laboratories Inc., Hercules, CA, USA). Protein was detected using TSP-1 antibody (1:500, Santa Cruz Biotechnology, Dallas, TX, USA) and m-IgGk BP-HRP (1:10,000, Santa Cruz Biotechnology, Dallas, TX, USA) as a secondary antibody. For molecular weight (kDa) determination, Bio-Rad Precision Plus Protein™ Dual Color Standards, 10 to 250 kDa; catalogue number: 1610374 (Bio-Rad Laboratories Inc., Hercules, CA, USA) was used. Band detection was done by using Clarity™ Western ECL Substrate (Bio-Rad Laboratories Inc., Hercules, CA, USA) and visualization using ChemiDoc Imaging System (Bio-Rad Laboratories Inc., Hercules, CA, USA). Band intensities of TSP-1 protein were normalized with total protein intensities (Pierce™ Reversible Protein Stain Kit for PVDF Membranes, Thermo Fisher Scientific, Waltham, MA, USA) and analyzed using Bio-Rad Image Lab Software (version 6.0.1, Bio-Rad Laboratories Inc., Hercules, CA, USA). Each lane represented each sample in each group.



IL-1RA protein expression in cAM.

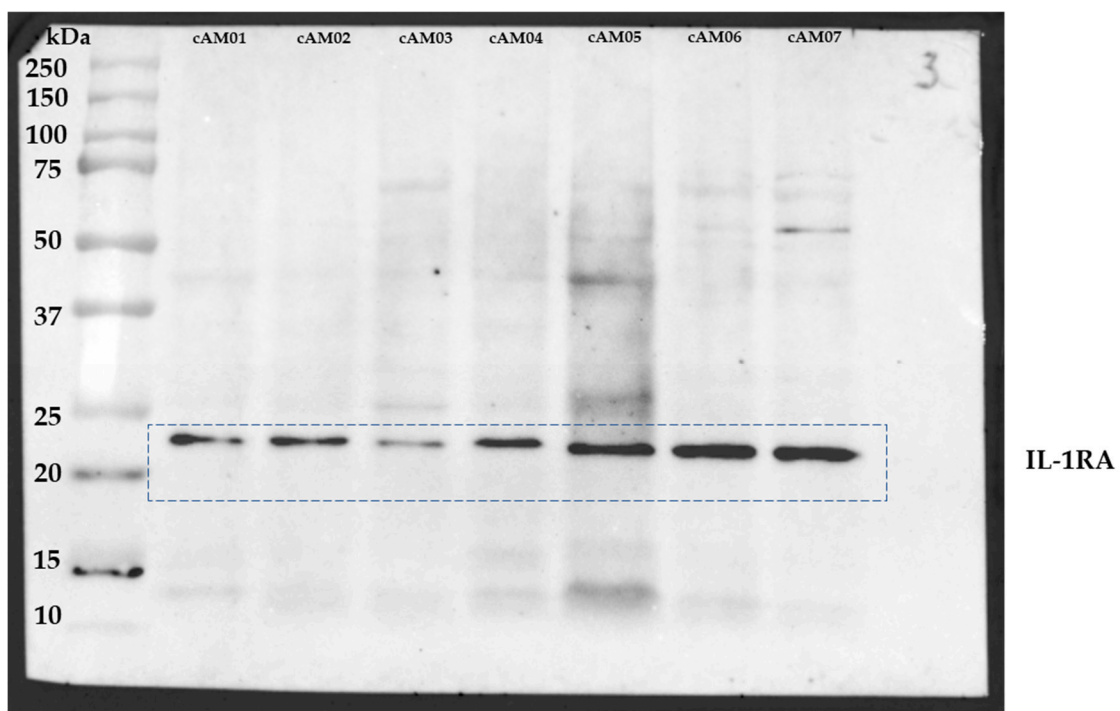

IL-1RA protein expression in cAME.

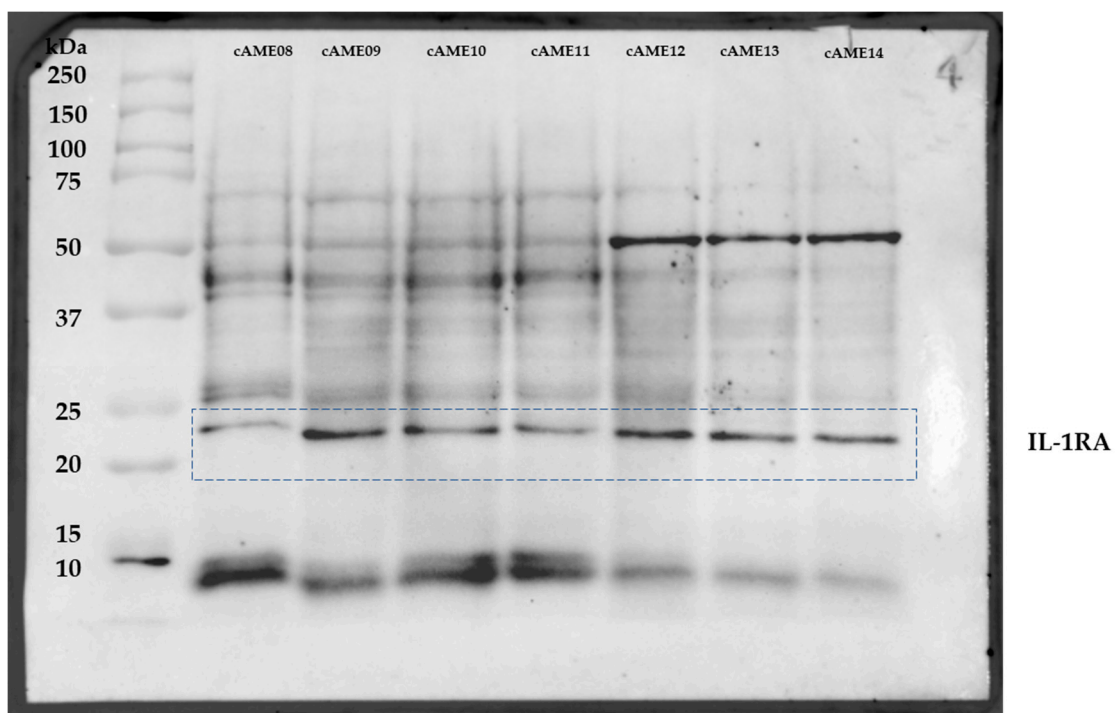

## IL-1RA protein expression in cAMX.

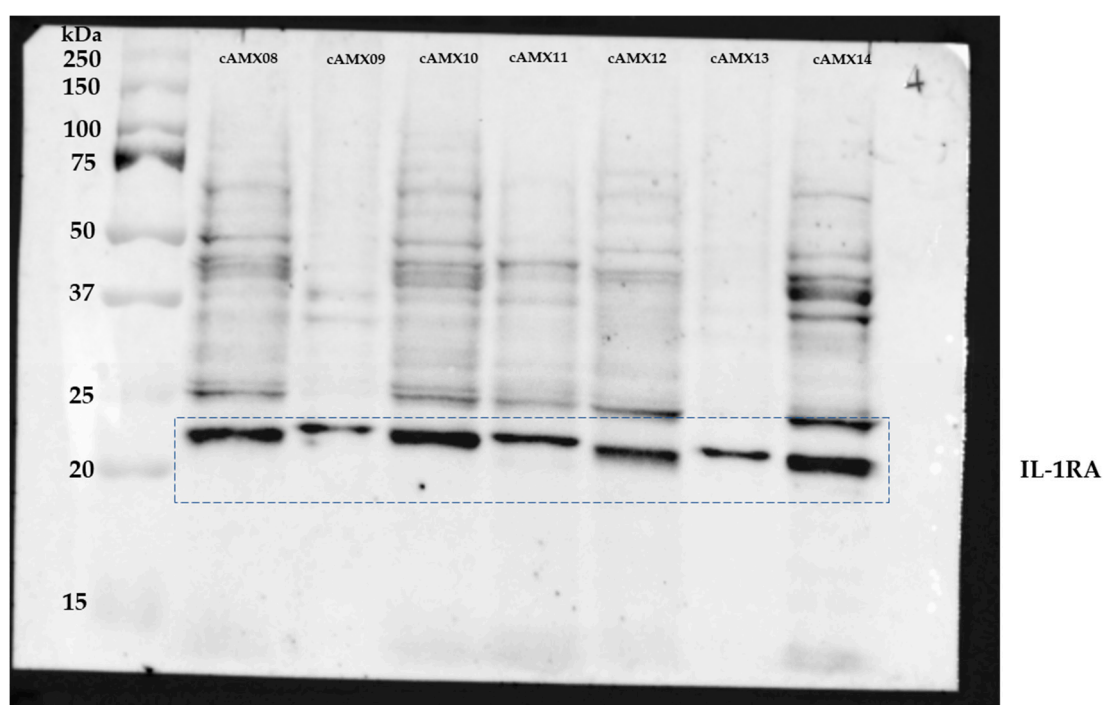

Western blot membranes of IL-1RA (molecular weight of IL-1RA ~18-22 kDa). Proteins separated from SDS-PAGE were transferred onto a 0.2  $\mu$ m PVDF membrane using a Trans-Blot Turbo Transfer System (Bio-Rad Laboratories Inc., Hercules, CA, USA). IL-1RA protein was detected using IL-1RA antibody (1:500, Thermo Fisher Scientific, Waltham, MA, USA) and anti-rabbit IgG HRP conjugated antibody (1:5000, R&D Systems Inc., Minneapolis, MN, USA) as a secondary antibody. To determine molecular weight (kDa), Bio-Rad Precision Plus Protein™ Dual Color Standards, 10 to 250 kDa; catalogue number: 1610374 (Bio-Rad Laboratories Inc., Hercules, CA, USA) was used. Clarity™ Western ECL Substrate (Bio-Rad Laboratories Inc., Hercules, CA, USA) was used for band detection and the ChemiDoc Imaging System (Bio-Rad Laboratories Inc., Hercules, CA, USA) was used for visualization. Band intensities of IL-1RA protein were normalized with total protein intensities (Pierce™ Reversible Protein Stain Kit for PVDF Membranes, Thermo Fisher Scientific, Waltham, MA, USA) and analyzed using Bio-Rad Image Lab Software (version 6.0.1, Bio-Rad Laboratories Inc., Hercules, CA, USA). Each lane represented each sample in each group.
